# Supplementary material
Source: publisher figshare collection journal article supplement (https://acs.figshare.com/ndownloader/files/25880703)
Supplement: Supplementary file 1 [file 25880703]

# Well-to-Wheels Analysis of Zero-Emission Plug-In Battery Electric Vehicle Technology for Medium- and Heavy-Duty Trucks

Xinyu Liu<sup>1\*</sup>, Amgad Elgowainy<sup>1</sup>, Ram Vijayagopal<sup>1</sup>, and Michael Wang<sup>1</sup>

<sup>1</sup>Energy Systems Division, Argonne National Laboratory, Lemont, IL

\*Corresponding author: Email: [xinyu.liu@anl.gov](mailto:xinyu.liu@anl.gov); Tel: +1 (630) 2524852; Address: Energy  
Systems Division, Argonne National Laboratory, 9700 S. Cass Avenue, Lemont, Illinois 60439,  
United States

This supporting information has 6 pages, 3 tables, and 3 figures.

Table S1 shows the weighing factors of non-idle and idle cycles.

Table S1: Weighting factors for duty cycles <sup>1</sup>

|                                         | Distance-weighted (%) |            |            | Time-weighted (%) |             |          | Average speed during non-idle cycles (mi/hr) |
|-----------------------------------------|-----------------------|------------|------------|-------------------|-------------|----------|----------------------------------------------|
|                                         | ARB Transient         | EPA 55 mph | EPA 65 mph | Drive idle        | Parked idle | Non-idle |                                              |
| Day Cabs (Short-haul)                   | 19                    | 17         | 64         | 0                 | 0           | 100      | 1                                            |
| Sleeper Cabs (Long-haul)                | 5                     | 9          | 86         | 0                 | 0           | 100      | 1                                            |
| Vocational - Regional                   | 20                    | 24         | 56         | 0                 | 25          | 75       | 38.41                                        |
| Vocational - Multi-Purpose (Class 2b-7) | 54                    | 29         | 17         | 17                | 25          | 58       | 23.18                                        |
| Vocational - Multi-Purpose (Class 8)    | 54                    | 23         | 23         | 17                | 25          | 58       | 23.27                                        |
| Vocational - Urban (Class 2b-7)         | 92                    | 8          | 0          | 15                | 25          | 60       | 16.25                                        |
| Vocational - Urban (Class 8)            | 90                    | 10         | 0          | 15                | 25          | 60       | 16.51                                        |

Table S2 and S3 list the results from Autonomie and Fleet DNA models.

Table S2: Diesel Trucks Fuel Consumption for various cycles

| Class    | Type                         | Payload (kg) | Test mass (kg) | Battery size (kWh) | Non-Idle Fuel Rate (DGE/mile) |              |              | Idle Fuel Rate <sup>2</sup> (DGE/hr) |
|----------|------------------------------|--------------|----------------|--------------------|-------------------------------|--------------|--------------|--------------------------------------|
|          |                              |              |                |                    | ARB cycle                     | 55 MPH cycle | 65 MPH cycle |                                      |
| <b>8</b> | Long-haul combination        | 17329        | 30454          | 2.4                | 0.208                         | 0.129        | 0.146        | 0.6                                  |
|          | Short-haul combination       | 17324        | 29371          | 2.4                | 0.204                         | 0.134        | 0.154        | 0.63                                 |
|          | Refuse                       | 12400        | 24522          | 3.2                | 0.189                         | 0.124        | 0.146        | 0.81                                 |
| <b>6</b> | Medium heavy-duty vocational | 5146         | 11324          | 3.2                | 0.110                         | 0.092        | 0.113        | 0.73                                 |
| <b>4</b> | Light heavy-duty vocational  | 2755         | 6839           | 3.2                | 0.081                         | 0.066        | 0.081        | 0.73                                 |
| <b>2</b> | Pick-up Trucks and Vans      | 608          | 3761           | 3.2                | 0.061                         | 0.051        | 0.063        | 0.36                                 |

Table S3: Battery Electric Trucks Fuel Consumption for various cycles

| Class | Type                         | Payload<br>(kg) | Test<br>mass<br>(kg) | Battery<br>size<br>(kWh) | Non-Idle Fuel Rate<br>(DGE/mile) |                 |                 | Idle Fuel<br>Rate<br>(DGE/hr) |
|-------|------------------------------|-----------------|----------------------|--------------------------|----------------------------------|-----------------|-----------------|-------------------------------|
|       |                              |                 |                      |                          | ARB<br>cycle                     | 55 MPH<br>cycle | 65 MPH<br>cycle |                               |
| 8     | Long-haul combination        | 17329           | 36998                | 1572.9                   | 0.089                            | 0.075           | 0.087           | 0.045                         |
|       | Short-haul combination       | 17324           | 32075                | 834.2                    | 0.080                            | 0.075           | 0.087           | 0.045                         |
|       | Refuse                       | 12400           | 26071                | 434.9                    | 0.055                            | 0.063           | 0.073           | 0.045                         |
| 6     | Medium heavy-duty vocational | 5146            | 11464                | 326.2                    | 0.028                            | 0.042           | 0.053           | 0.0748                        |
| 4     | Light heavy-duty vocational  | 2755            | 6620                 | 219.0                    | 0.018                            | 0.027           | 0.033           | 0.0748                        |
| 2     | Pick-up Trucks and Vans      | 608             | 3840                 | 230.7                    | 0.013                            | 0.021           | 0.026           | 0.0258                        |

Figure S1 depicts how the U.S. and regional electricity mixes evolve from 2019 to 2030. Figure S2 and S3 show the regional electricity mix emission intensities for year 2019 and 2030, respectively.

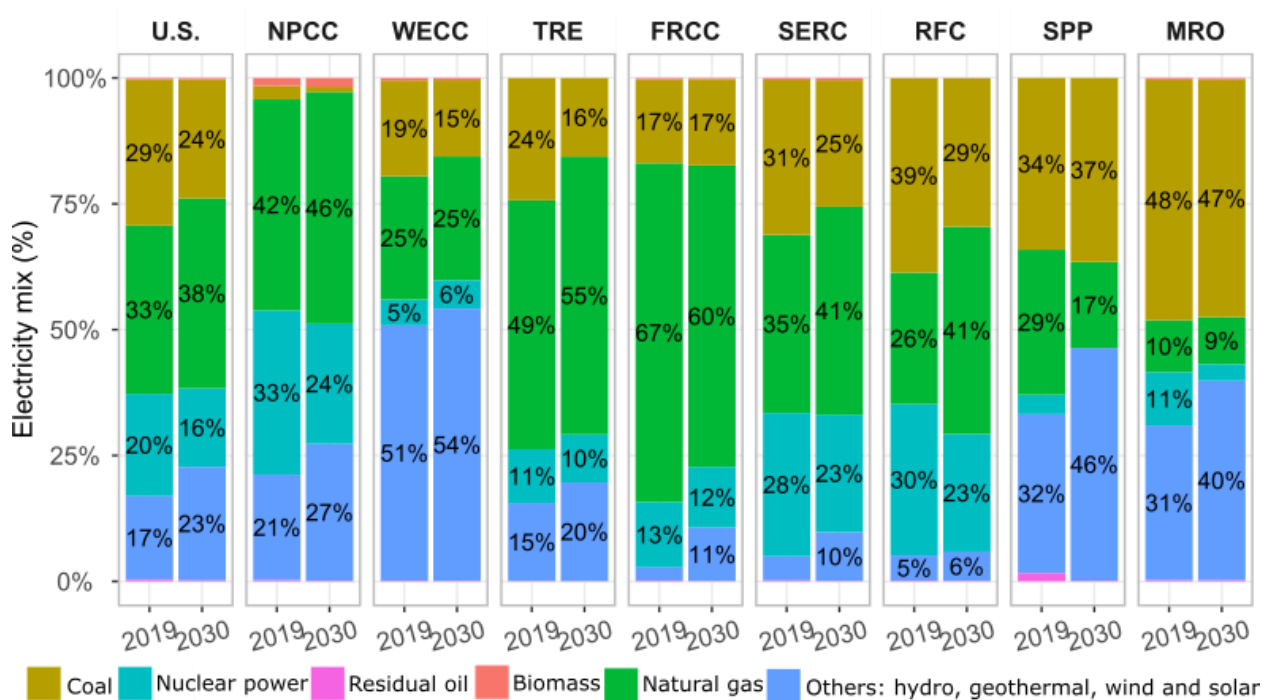

Figure S1: U.S. and regional electricity mix for 2019 and 2030 <sup>3</sup>

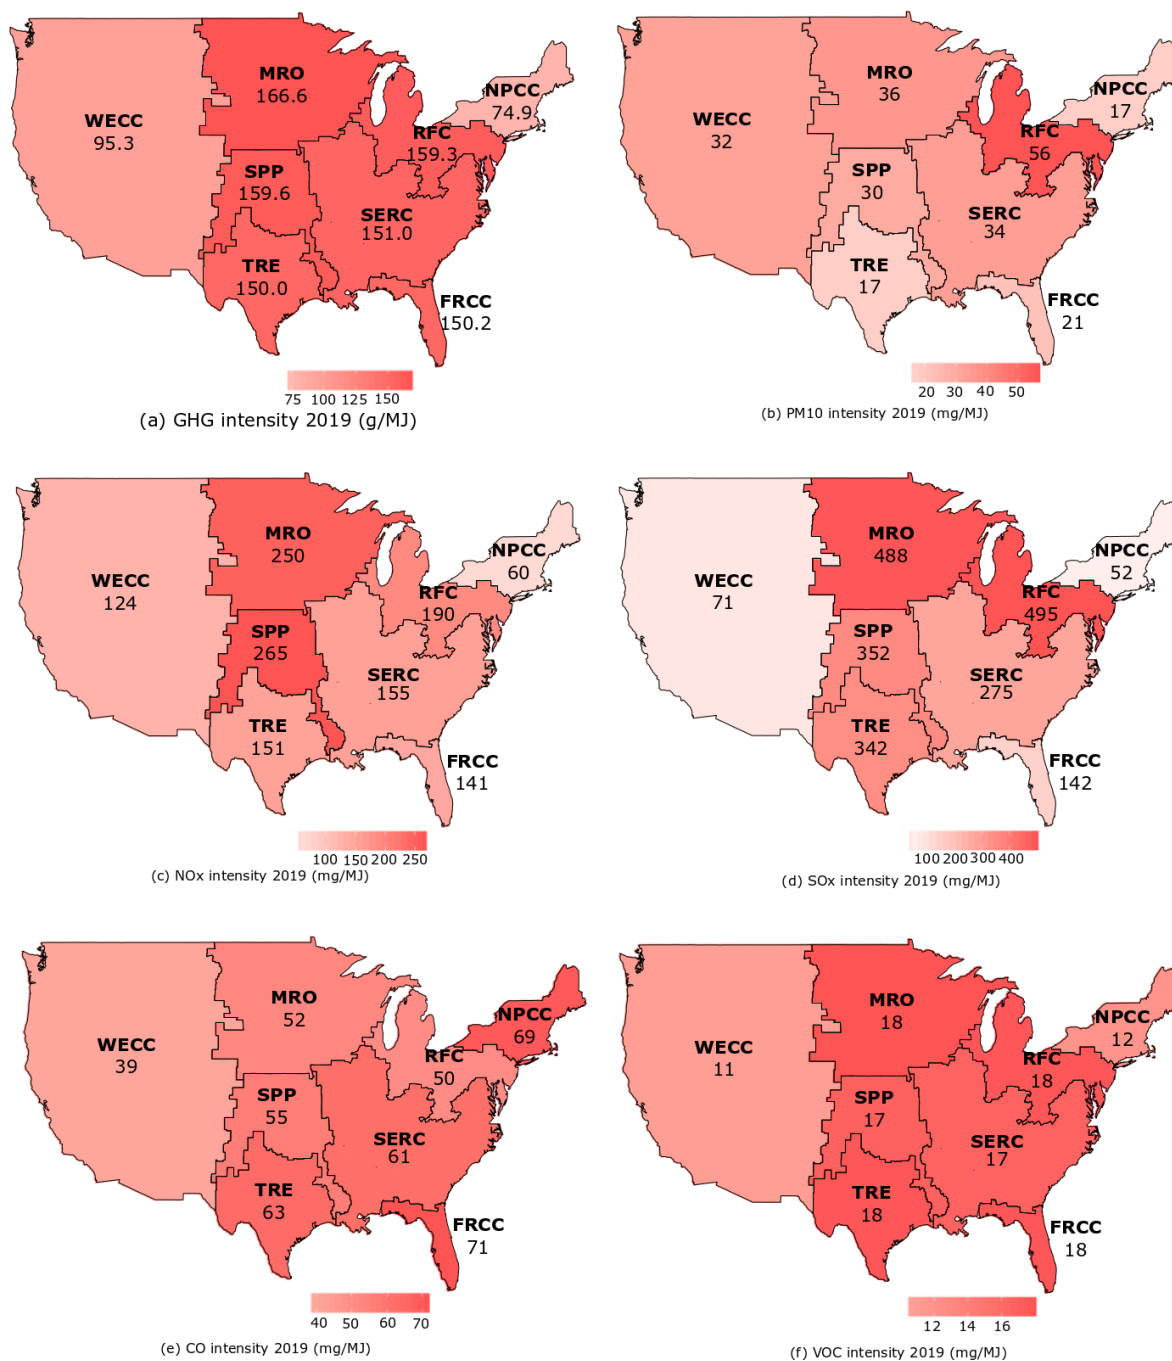

Figure S2: 2019 regional electricity mix emission intensities <sup>3</sup>

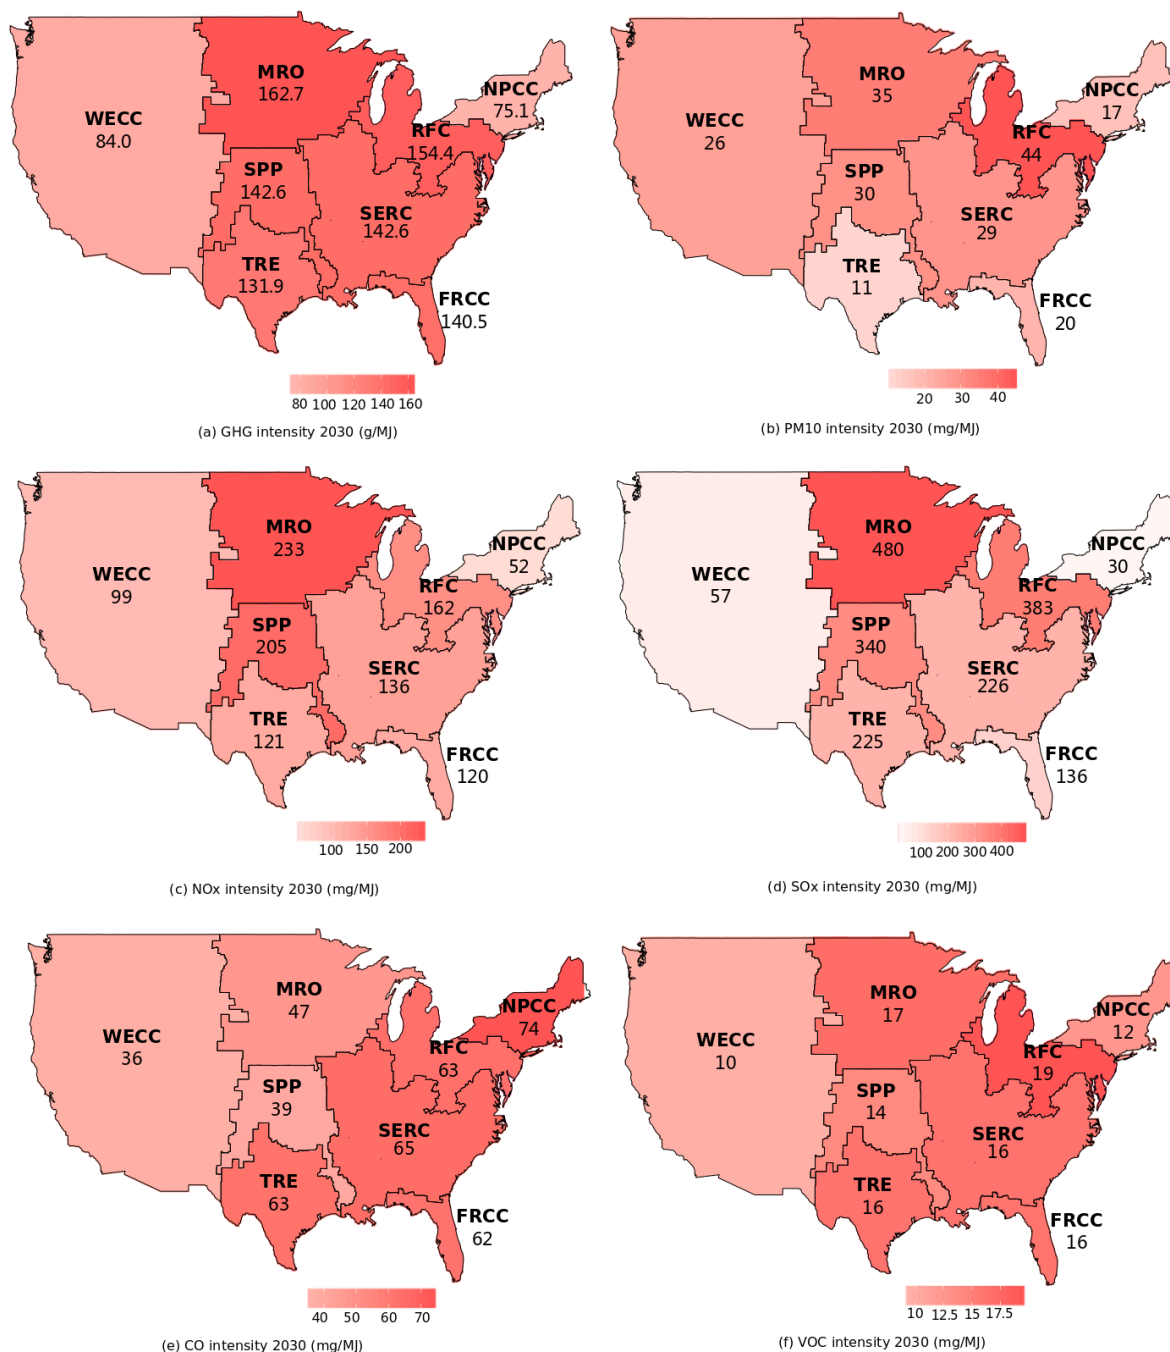

Figure S3: 2030 regional electricity mix emission intensities <sup>3</sup>

## Reference

- (1) United States Environmental Protection Agency. Greenhouse Gas Emissions and Fuel Efficiency Standards for Medium- and Heavy-Duty Engines and Vehicles— Phase 2. 2016, pp 73478–74274.
- (2) National Renewable Energy Laboratory. Fleet DNA: Commercial Fleet Vehicle Operating Data <https://www.nrel.gov/transportation/fleettest-fleet-dna.html> (accessed Nov 22, 2019).

- (3) Energy Systems. Argonne National Laboratory. The Greenhouse Gases, Regulated Emissions, and Energy Use in Transportation (GREET) Model <https://greet.es.anl.gov/> (accessed Apr 16, 2019).
